**E22 EOSINOPHILIC POLYANGIITIS PRESENTING WITH TEMPORAL ARTERY ANEURYSM**

Megan MacDiarmid<sup>1</sup>, Dmitri Nepogodiev<sup>2</sup>, Alok Tiwari<sup>2</sup>,  
Martin Duddy<sup>3</sup>, Martyn Carey<sup>4</sup> and Paresch Jobanputra<sup>1</sup>  
<sup>1</sup>Rheumatology, <sup>2</sup>Vascular Surgery, <sup>3</sup>Interventional Radiology and  
<sup>4</sup>Pathology, University Hospitals Birmingham NHS Foundation Trust,  
Birmingham, UK

**Disclosure statement:** The authors have declared no conflicts of interest.
